# Supplementary material
Source: publisher site journal article supplement (https://www.dovepress.com/article/418276)
Supplement: Supplementary file 1 [file get_supplementary_file.php]

**Supplementary Table** The neoadjuvant regimens and cycles of 128 patients

| regimens | cycles |
| --- | --- |
| Toripalimab 240mg+albumin bound paclitaxel plus platinum | 3 |
| Toripalimab 240mg+albumin bound paclitaxel plus platinum | 3 |
| Toripalimab 240mg+albumin bound paclitaxel plus platinum | 3 |
| Toripalimab 240mg+albumin bound paclitaxel plus platinum | 3 |
| Toripalimab 240mg+albumin bound paclitaxel plus platinum | 3 |
| Toripalimab 240mg+albumin bound paclitaxel plus platinum | 4 |
| Toripalimab 240mg+pemetrexed plus platinum | 3 |
| Toripalimab 240mg+albumin bound paclitaxel plus platinum | 3 |
| Toripalimab 240mg+albumin bound paclitaxel plus platinum | 3 |
| Toripalimab 240mg+albumin bound paclitaxel plus platinum | 3 |
| Toripalimab 240mg+pemetrexed plus platinum | 3 |
| Toripalimab 240mg+albumin bound paclitaxel plus platinum | 3 |
| Toripalimab 240mg+pemetrexed plus platinum | 3 |
| Toripalimab 240mg+albumin bound paclitaxel plus platinum | 3 |
| Toripalimab 240mg+albumin bound paclitaxel plus platinum | 3 |
| Toripalimab 240mg+albumin bound paclitaxel plus platinum | 3 |
| Toripalimab 240mg+albumin bound paclitaxel plus platinum | 3 |
| Toripalimab 240mg+pemetrexed plus platinum | 3 |
| Toripalimab 240mg+albumin bound paclitaxel plus platinum | 3 |
| Toripalimab 240mg+albumin bound paclitaxel plus platinum | 3 |
| Toripalimab 240mg+albumin bound paclitaxel plus platinum | 4 |
| Toripalimab 240mg+albumin bound paclitaxel plus platinum | 3 |
| Toripalimab 240mg+pemetrexed plus platinum | 4 |
| Toripalimab 240mg+albumin bound paclitaxel plus platinum | 4 |
| Toripalimab 240mg+pemetrexed plus platinum | 4 |
| Toripalimab 240mg+albumin bound paclitaxel plus platinum | 3 |
| Tislelizumab 200mg+albumin bound paclitaxel plus platinum | 3 |
| Tislelizumab 200mg+albumin bound paclitaxel plus platinum | 3 |
| Tislelizumab 200mg+pemetrexed plus platinum | 3 |
| Tislelizumab 200mg+albumin bound paclitaxel plus platinum | 3 |
| Tislelizumab 200mg+albumin bound paclitaxel plus platinum | 3 |
| Tislelizumab 200mg+albumin bound paclitaxel plus platinum | 3 |
| Tislelizumab 200mg+albumin bound paclitaxel plus platinum | 3 |
| Tislelizumab 200mg+albumin bound paclitaxel plus platinum | 4 |
| Tislelizumab 200mg+albumin bound paclitaxel plus platinum | 4 |
| Tislelizumab 200mg+albumin bound paclitaxel plus platinum | 3 |
| Tislelizumab 200mg+albumin bound paclitaxel plus platinum | 3 |
| Tislelizumab 200mg+albumin bound paclitaxel plus platinum | 3 |
| Tislelizumab 200mg+pemetrexed plus platinum | 3 |
| Tislelizumab 200mg+albumin bound paclitaxel plus platinum | 3 |
| Tislelizumab 200mg+albumin bound paclitaxel plus platinum | 3 |
| Tislelizumab 200mg+albumin bound paclitaxel plus platinum | 3 |
| Tislelizumab 200mg+pemetrexed plus platinum | 3 |
| Tislelizumab 200mg+albumin bound paclitaxel plus platinum | 3 |
| Tislelizumab 200mg+albumin bound paclitaxel plus platinum | 3 |
| Tislelizumab 200mg+albumin bound paclitaxel plus platinum | 3 |
| Tislelizumab 200mg+albumin bound paclitaxel plus platinum | 3 |
| Tislelizumab 200mg+albumin bound paclitaxel plus platinum | 3 |
| Tislelizumab 200mg+albumin bound paclitaxel plus platinum | 3 |
| Tislelizumab 200mg+albumin bound paclitaxel plus platinum | 3 |
| Tislelizumab 200mg+albumin bound paclitaxel plus platinum | 3 |
| Tislelizumab 200mg+albumin bound paclitaxel plus platinum | 3 |
| Tislelizumab 200mg+albumin bound paclitaxel plus platinum | 3 |
| Tislelizumab 200mg+albumin bound paclitaxel plus platinum | 3 |
| Tislelizumab 200mg+pemetrexed plus platinum | 2 |
| Tislelizumab 200mg+albumin bound paclitaxel plus platinum | 3 |
| Pembrolizumab+albumin bound paclitaxel plus platinum | 3 |
| Pembrolizumab+albumin bound paclitaxel plus platinum | 3 |
| Sintilimab 200mg+pemetrexed plus platinum | 2 |
| Sintilimab 200mg+albumin bound paclitaxel plus platinum | 2 |
| Sintilimab 200mg+albumin bound paclitaxel plus platinum | 3 |
| Sintilimab 200mg+albumin bound paclitaxel plus platinum | 2 |
| Pembrolizumab+albumin bound paclitaxel plus platinum | 2 |
| Pembrolizumab+albumin bound paclitaxel plus platinum | 2 |
| Toripalimab 240mg+albumin bound paclitaxel plus platinum | 3 |
| Sintilimab 200mg+pemetrexed plus platinum | 3 |
| Sintilimab 200mg+pemetrexed plus platinum | 2 |
| Sintilimab+bevacizumab+albumin bound paclitaxel plus platinum | 3 |
| Tislelizumab 200mg+albumin bound paclitaxel plus platinum | 2 |
| Pembrolizumab+albumin bound paclitaxel plus platinum | 3 |
| Nivolumab+albumin bound paclitaxel plus platinum | 3 |
| Sintilimab 200mg+albumin bound paclitaxel plus platinum | 3 |
| Durvalumab 1000mg+albumin bound paclitaxel plus platinum | 3 |
| Sintilimab 200mg+albumin bound paclitaxel plus platinum | 2 |
| Sintilimab 200mg+ albumin bound paclitaxel | 2 |
| Tislelizumab 200mg+albumin bound paclitaxel plus platinum | 3 |
| Sintilimab 200mg+albumin bound paclitaxel plus platinum | 5 |
| Durvalumab 1000mg+albumin bound paclitaxel plus platinum | 5 |
| Sintilimab 200mg+pemetrexed plus platinum | 4 |
| Sintilimab 200mg+albumin bound paclitaxel plus platinum | 3 |
| Pembrolizumab+albumin bound paclitaxel plus platinum | 4 |
| Camrelizumab 200mg+albumin bound paclitaxel plus platinum | 4 |
| Pembrolizumab+albumin bound paclitaxel plus platinum | 2 |
| Pembrolizumab+albumin bound paclitaxel plus platinum | 3 |
| Toripalimab 240mg+albumin bound paclitaxel plus platinum | 2 |
| Durvalumab 1000mg+albumin bound paclitaxel plus platinum | 3 |
| Camrelizumab 200mg+albumin bound paclitaxel plus platinum | 3 |
| Toripalimab 240mg+albumin bound paclitaxel plus platinum | 6 |
| Durvalumab 1000mg+albumin bound paclitaxel plus platinum | 2 |
| Durvalumab 1000mg+albumin bound paclitaxel plus platinum | 2 |
| Tislelizumab 200mg+albumin bound paclitaxel plus platinum | 2 |
| Durvalumab 1000mg+albumin bound paclitaxel plus platinum | 3 |
| Durvalumab 1000mg+pemetrexed plus platinum | 3 |
| Tislelizumab 200mg+albumin bound paclitaxel plus platinum | 2 |
| Tislelizumab 200mg+albumin bound paclitaxel plus platinum | 3 |
| Nivolumab+albumin bound paclitaxel plus platinum | 3 |
| Durvalumab 1000mg+albumin bound paclitaxel plus platinum | 3 |
| Camrelizumab 200mg+albumin bound paclitaxel plus platinum | 2 |
| Sintilimab 200mg+albumin bound paclitaxel plus platinum | 5 |
| Pembrolizumab+gemcitabine plus platinum | 3 |
| Sintilimab 200mg+albumin bound paclitaxel plus platinum | 2 |
| Tislelizumab 200mg+albumin bound paclitaxel plus platinum | 2 |
| Camrelizumab 200mg+pemetrexed plus platinum | 2 |
| Tislelizumab 200mg+pemetrexed plus platinum | 5 |
| Tislelizumab 200mg+albumin bound paclitaxel plus platinum | 3 |
| Pembrolizumab+albumin bound paclitaxel plus platinum | 3 |
| Sintilimab 200mg+albumin bound paclitaxel plus platinum | 2 |
| Tislelizumab 200mg+albumin bound paclitaxel plus platinum | 2 |
| Tislelizumab 200mg+albumin bound paclitaxel plus platinum | 2 |
| Tislelizumab 200mg+albumin bound paclitaxel plus platinum | 3 |
| Tislelizumab 200mg+albumin bound paclitaxel plus platinum | 3 |
| Tislelizumab 200mg+albumin bound paclitaxel plus platinum | 2 |
| Tislelizumab 200mg+albumin bound paclitaxel plus platinum | 2 |
| Durvalumab 1000mg+albumin bound paclitaxel plus platinum | 3 |
| Sintilimab 200mg+ docetaxel plus platinum | 2 |
| Sintilimab 200mg+albumin bound paclitaxel plus platinum | 3 |
| Camrelizumab 200mg+albumin bound paclitaxel plus platinum | 4 |
| Sintilimab 200mg+albumin bound paclitaxel plus platinum | 3 |
| Sintilimab 200mg+albumin bound paclitaxel plus platinum | 2 |
| Tislelizumab 200mg+albumin bound paclitaxel plus platinum | 3 |
| Sintilimab 200mg+albumin bound paclitaxel plus platinum | 2 |
| Sintilimab 200mg+albumin bound paclitaxel plus platinum | 3 |
| Tislelizumab 200mg+albumin bound paclitaxel plus platinum | 2 |
| Sintilimab 200mg+albumin bound paclitaxel plus platinum | 2 |
| Tislelizumab 200mg+albumin bound paclitaxel plus platinum | 3 |
| Tislelizumab 200mg+albumin bound paclitaxel plus platinum | 2 |
| Sintilimab 200mg+albumin bound paclitaxel plus platinum | 2 |
| Tislelizumab 200mg+albumin bound paclitaxel plus platinum | 6 |


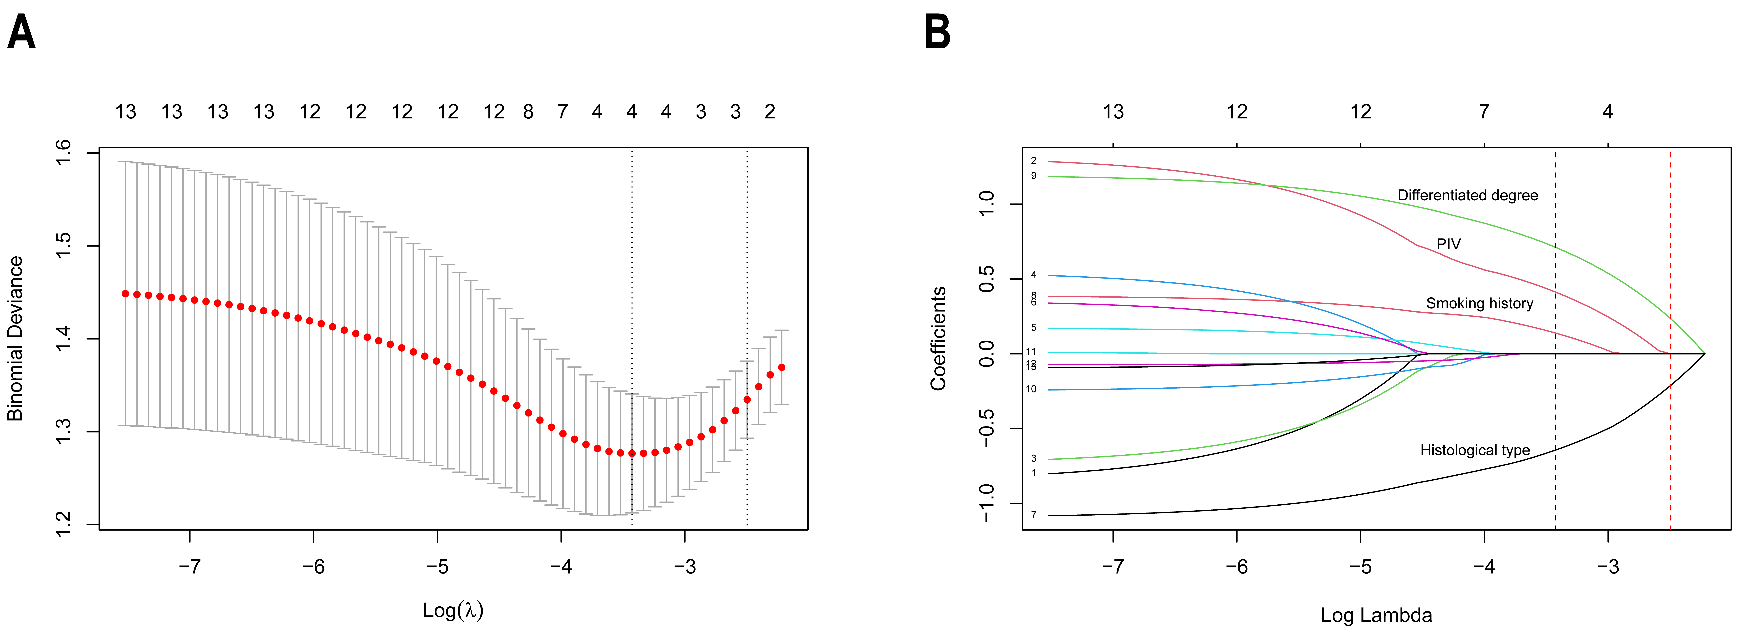
**Supplementary Figure 1**

**Supplementary Figure 2**

**
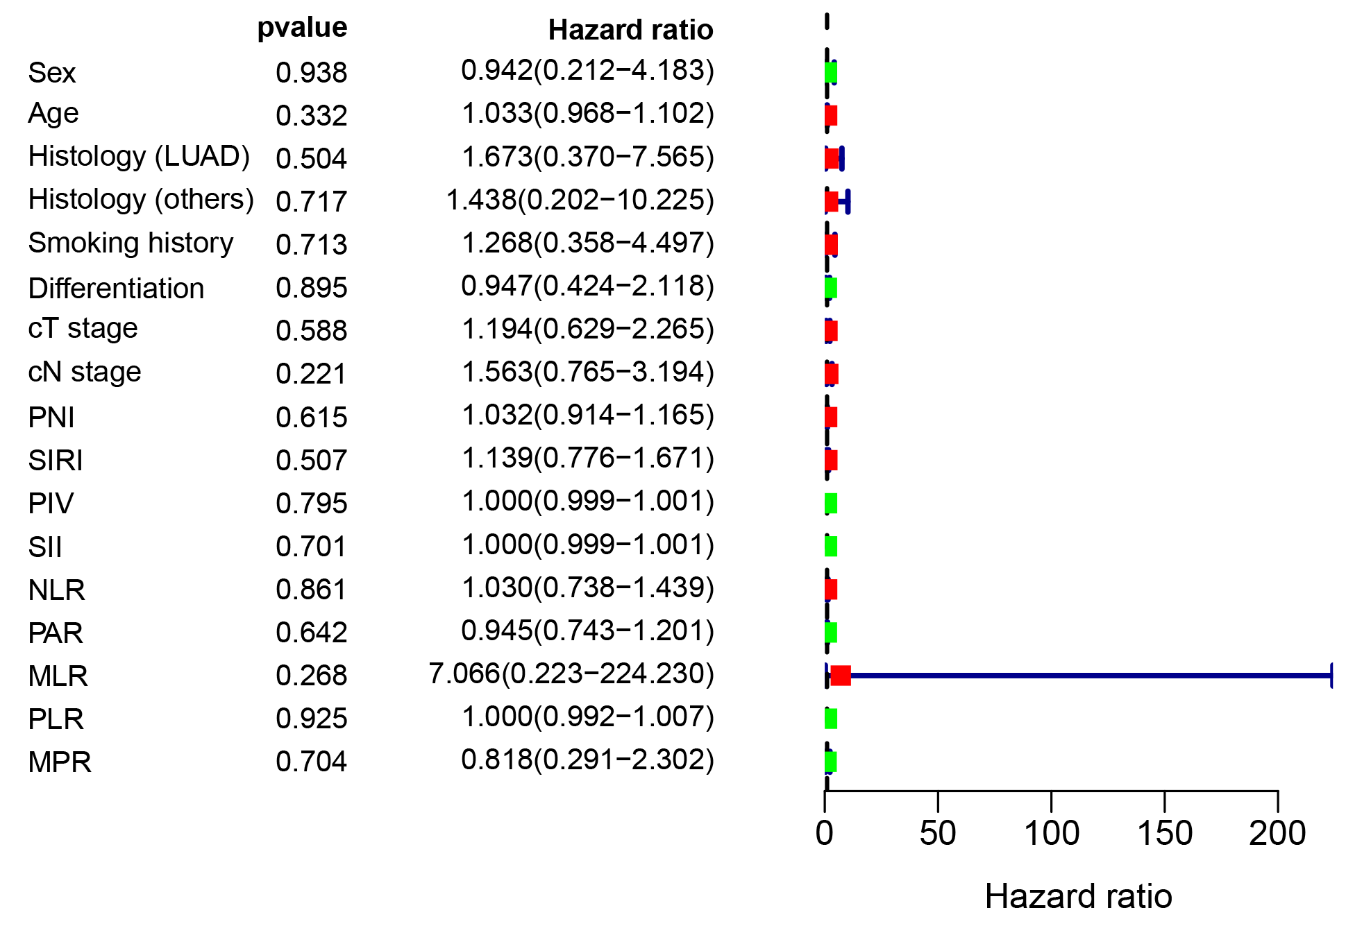
**

**Supplementary Figure 3**

**
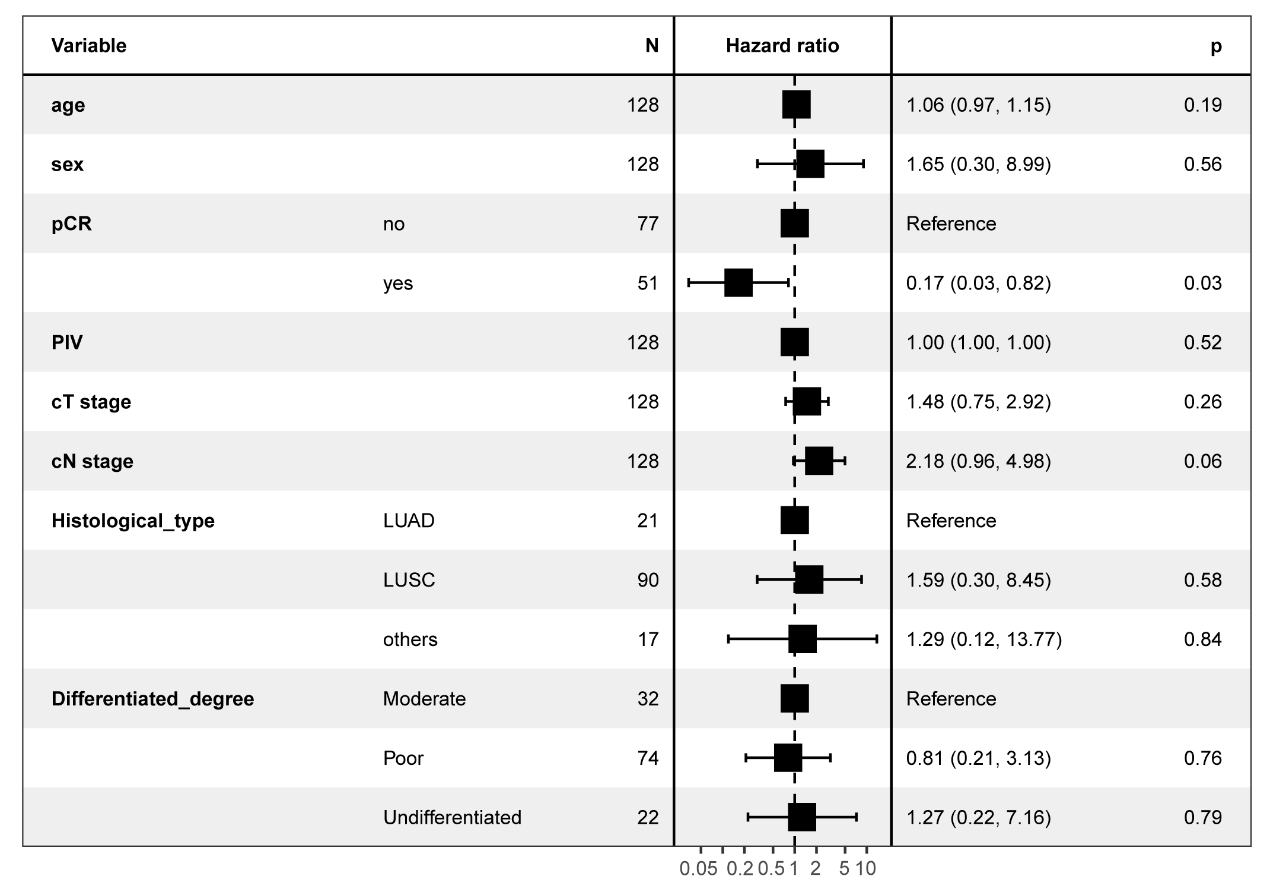
**

**Supplementary figure legend**

**Supplementary figure 1:** The LASSO regression model identified 4 candidate predictors from 13 variables. **(A)** Ten-fold cross‐validation for tuning parameter selection in the LASSO model. The dotted vertical lines were drawn at the best value of log λ by using the minimum criteria and 1-SE criteria. The intersection point of the left dotted line and the abscissa axis (bottom) showed the optimal value of log λ (-3.71), the corresponding value in the abscissa axis (top) showed the number of variables with non-zero coefficient. **(B)** LASSO coefficient profiles of the 13 variables. The horizontal axis (bottom) represented the log λ value of the independent variable, the horizontal axis (top) represented the number of variables with non-zero coefficient, the vertical axis represented the coefficient of the independent variable, and each curve represented the variation trajectory of the coefficient of each independent variable. The variation trajectory of 4 candidate predictors have been marked.

**Supplementary figure 2:** Forest plot of univariate Cox model for disease-free survival. Included 9 clinicopathological factors (except pCR) and 8 inflammatory index.

**Supplementary figure 3:** Forest plot of multivariate Cox model for disease-free survival. Included age, sex, cT stage, cN stage, pCR, histological type, differentiated degree and PIV. Only pCR was the independent prognostic factor for patients with neoadjuvant immunotherapy

**The R codes for Figure 3**

library(car)

library(rms)

library(pROC)

library(rmda)

training_dataset<- read.csv(" ", header = TRUE)

f_lrm <-lrm(pCR ~ PIV+Histological_type+Differentiated_degree, data=training_dataset, x=TRUE, y=TRUE,maxit=1000)

ddist <- datadist(training_dataset)

options(datadist='ddist')

nomogram <- nomogram(f_lrm,fun=function(x)1/(1+exp(-x)),

fun.at = c(0.01,0.1,0.3,0.5,0.8,0.9,0.99),

funlabel = "Probability of pCR",

lp=F,

conf.int = F,

abbrev = F)

plot(nomogram)

pred_f_training<-predict(f_lrm,training_dataset)

modelroc <- roc(training_dataset$pCR,pred_f_training)

plot(modelroc, print.auc=TRUE, auc.polygon=TRUE, grid=c(0.1, 0.2),

print.thres=TRUE)

cal <- calibrate(f_lrm)

plot(cal)

DCA_training<- decision_curve(pCR ~ PIV+Histological_type+Differentiated_degree,data = training_dataset

#,policy = "opt-in"

,study.design = 'cohort')

plot_decision_curve(DCA_training,curve.names= c('Nomogram model'))
